# Supplementary figures and images for: Genome size evolution at the speciation level: The cryptic species complex Brachionus plicatilis(Rotifera)
Source: Springer Nature journal article supplement (doi:10.1186/1471-2148-11-90), 2011-04-07

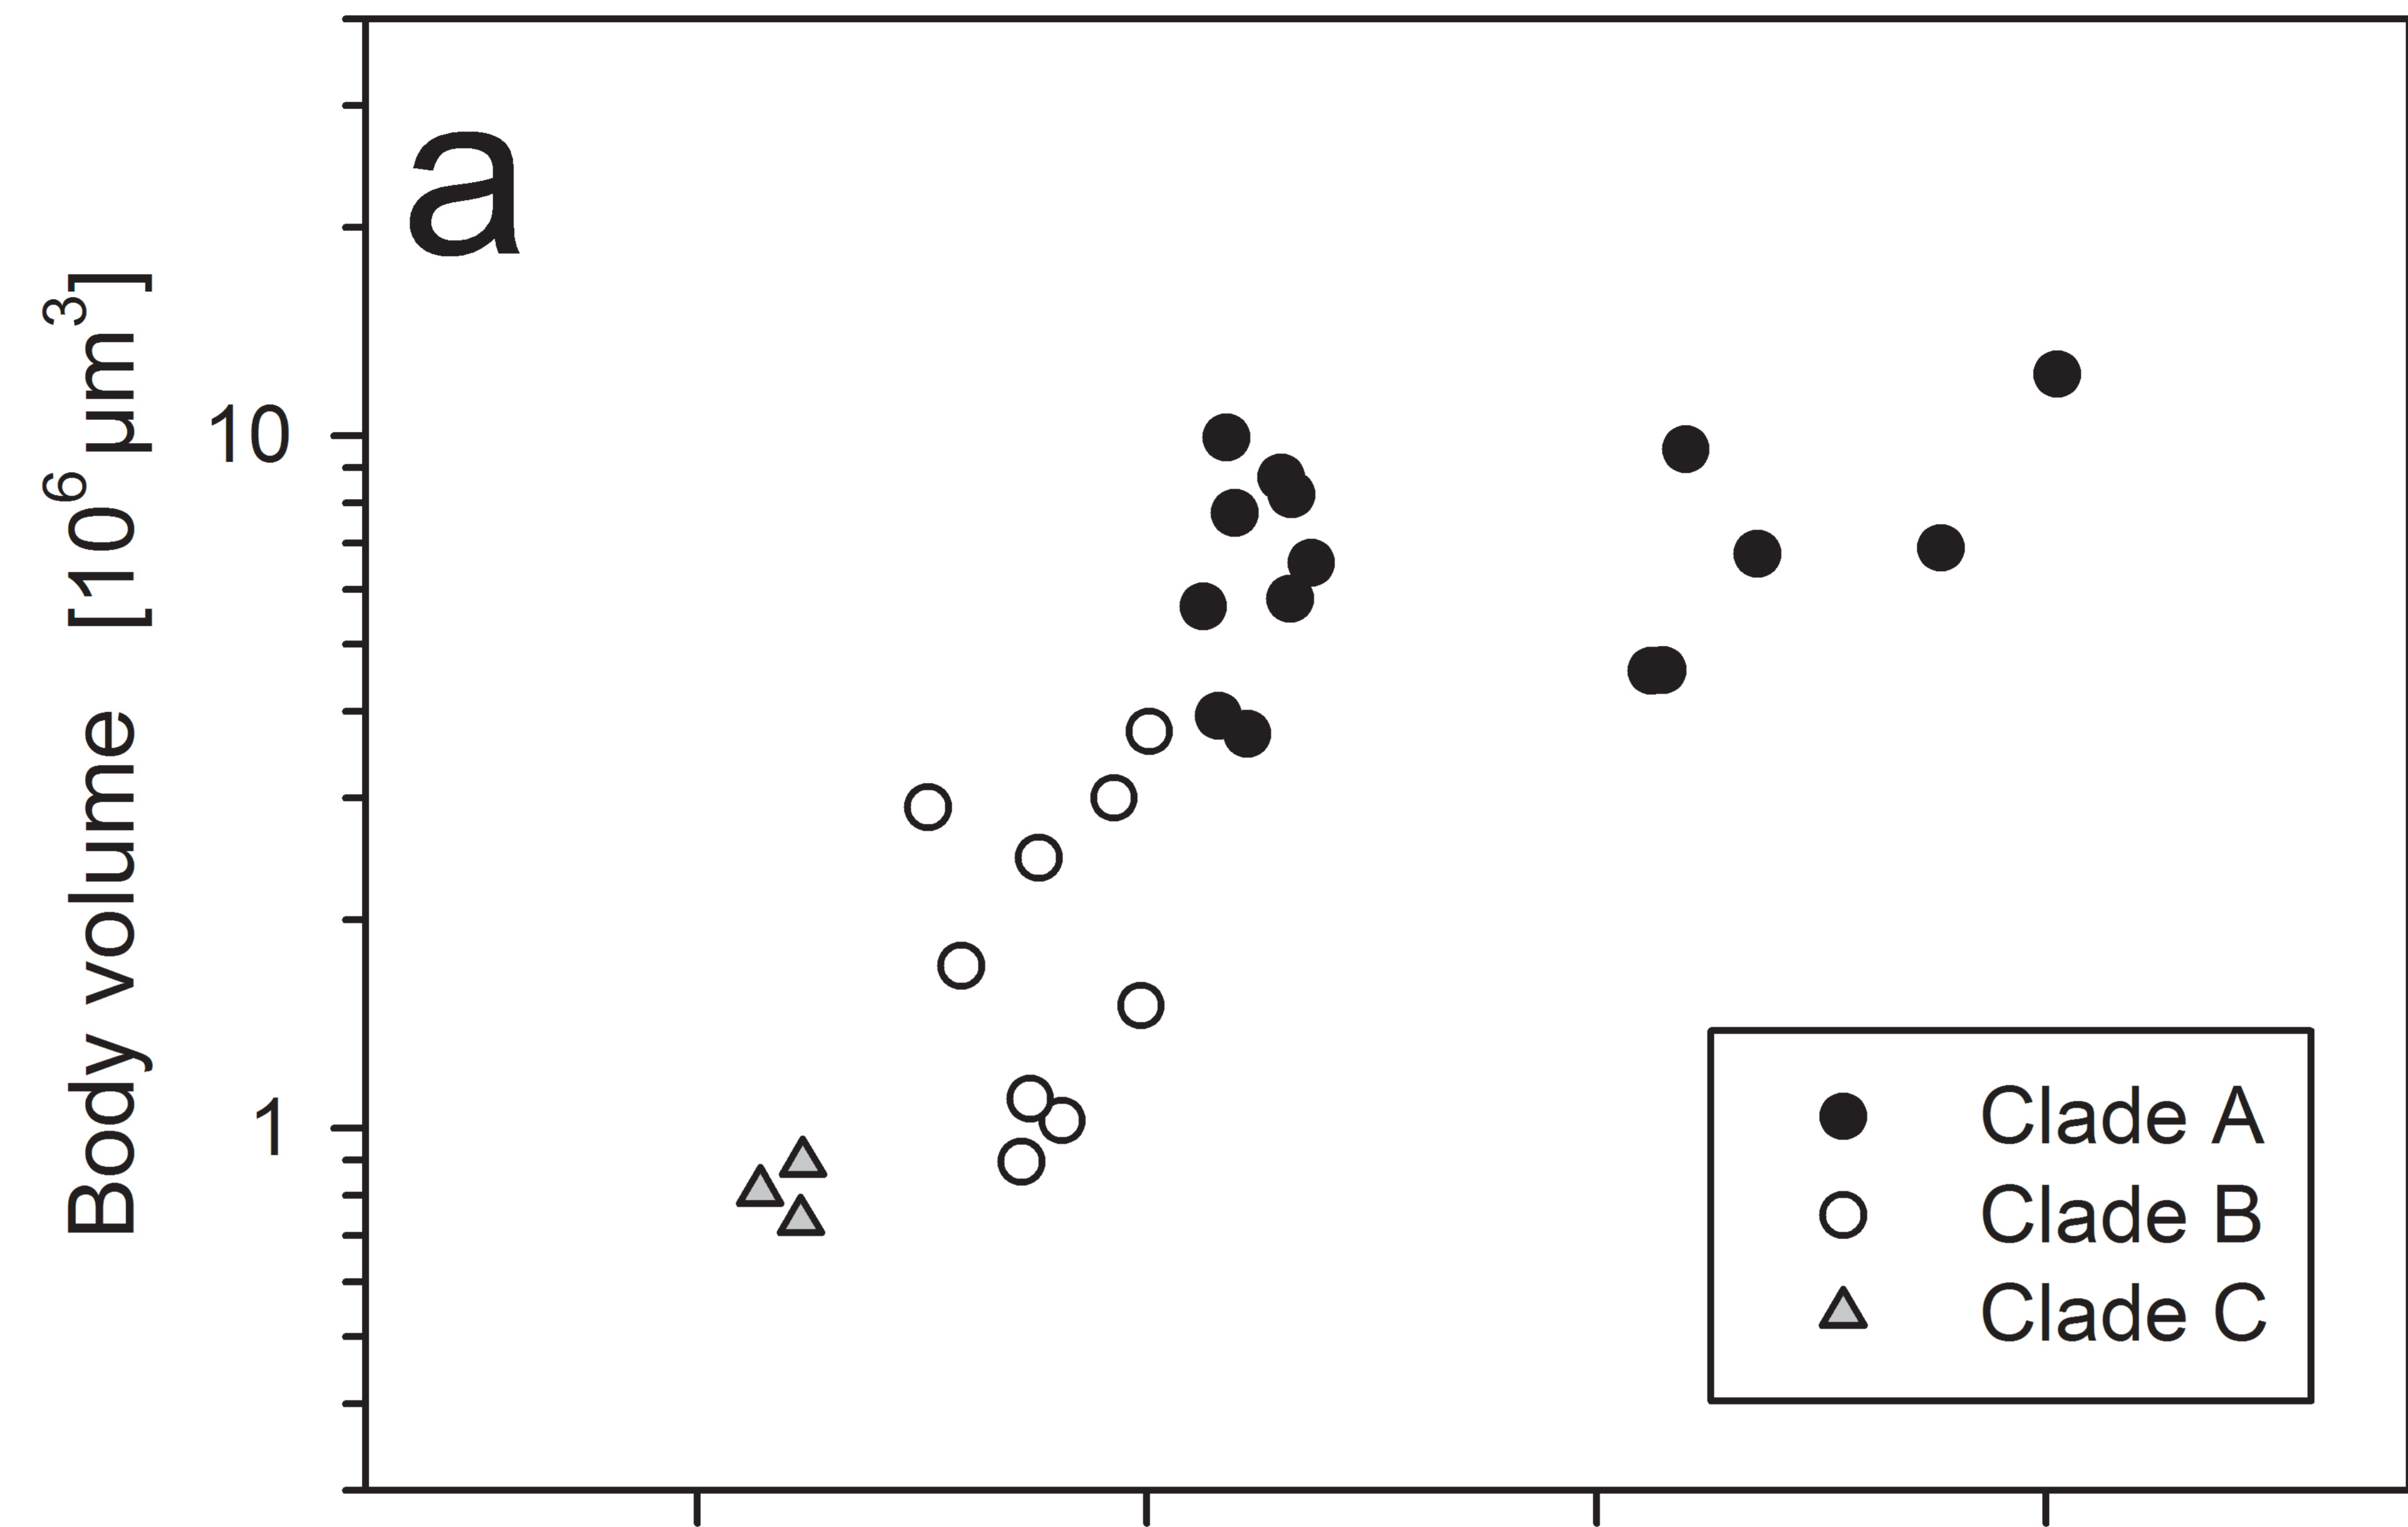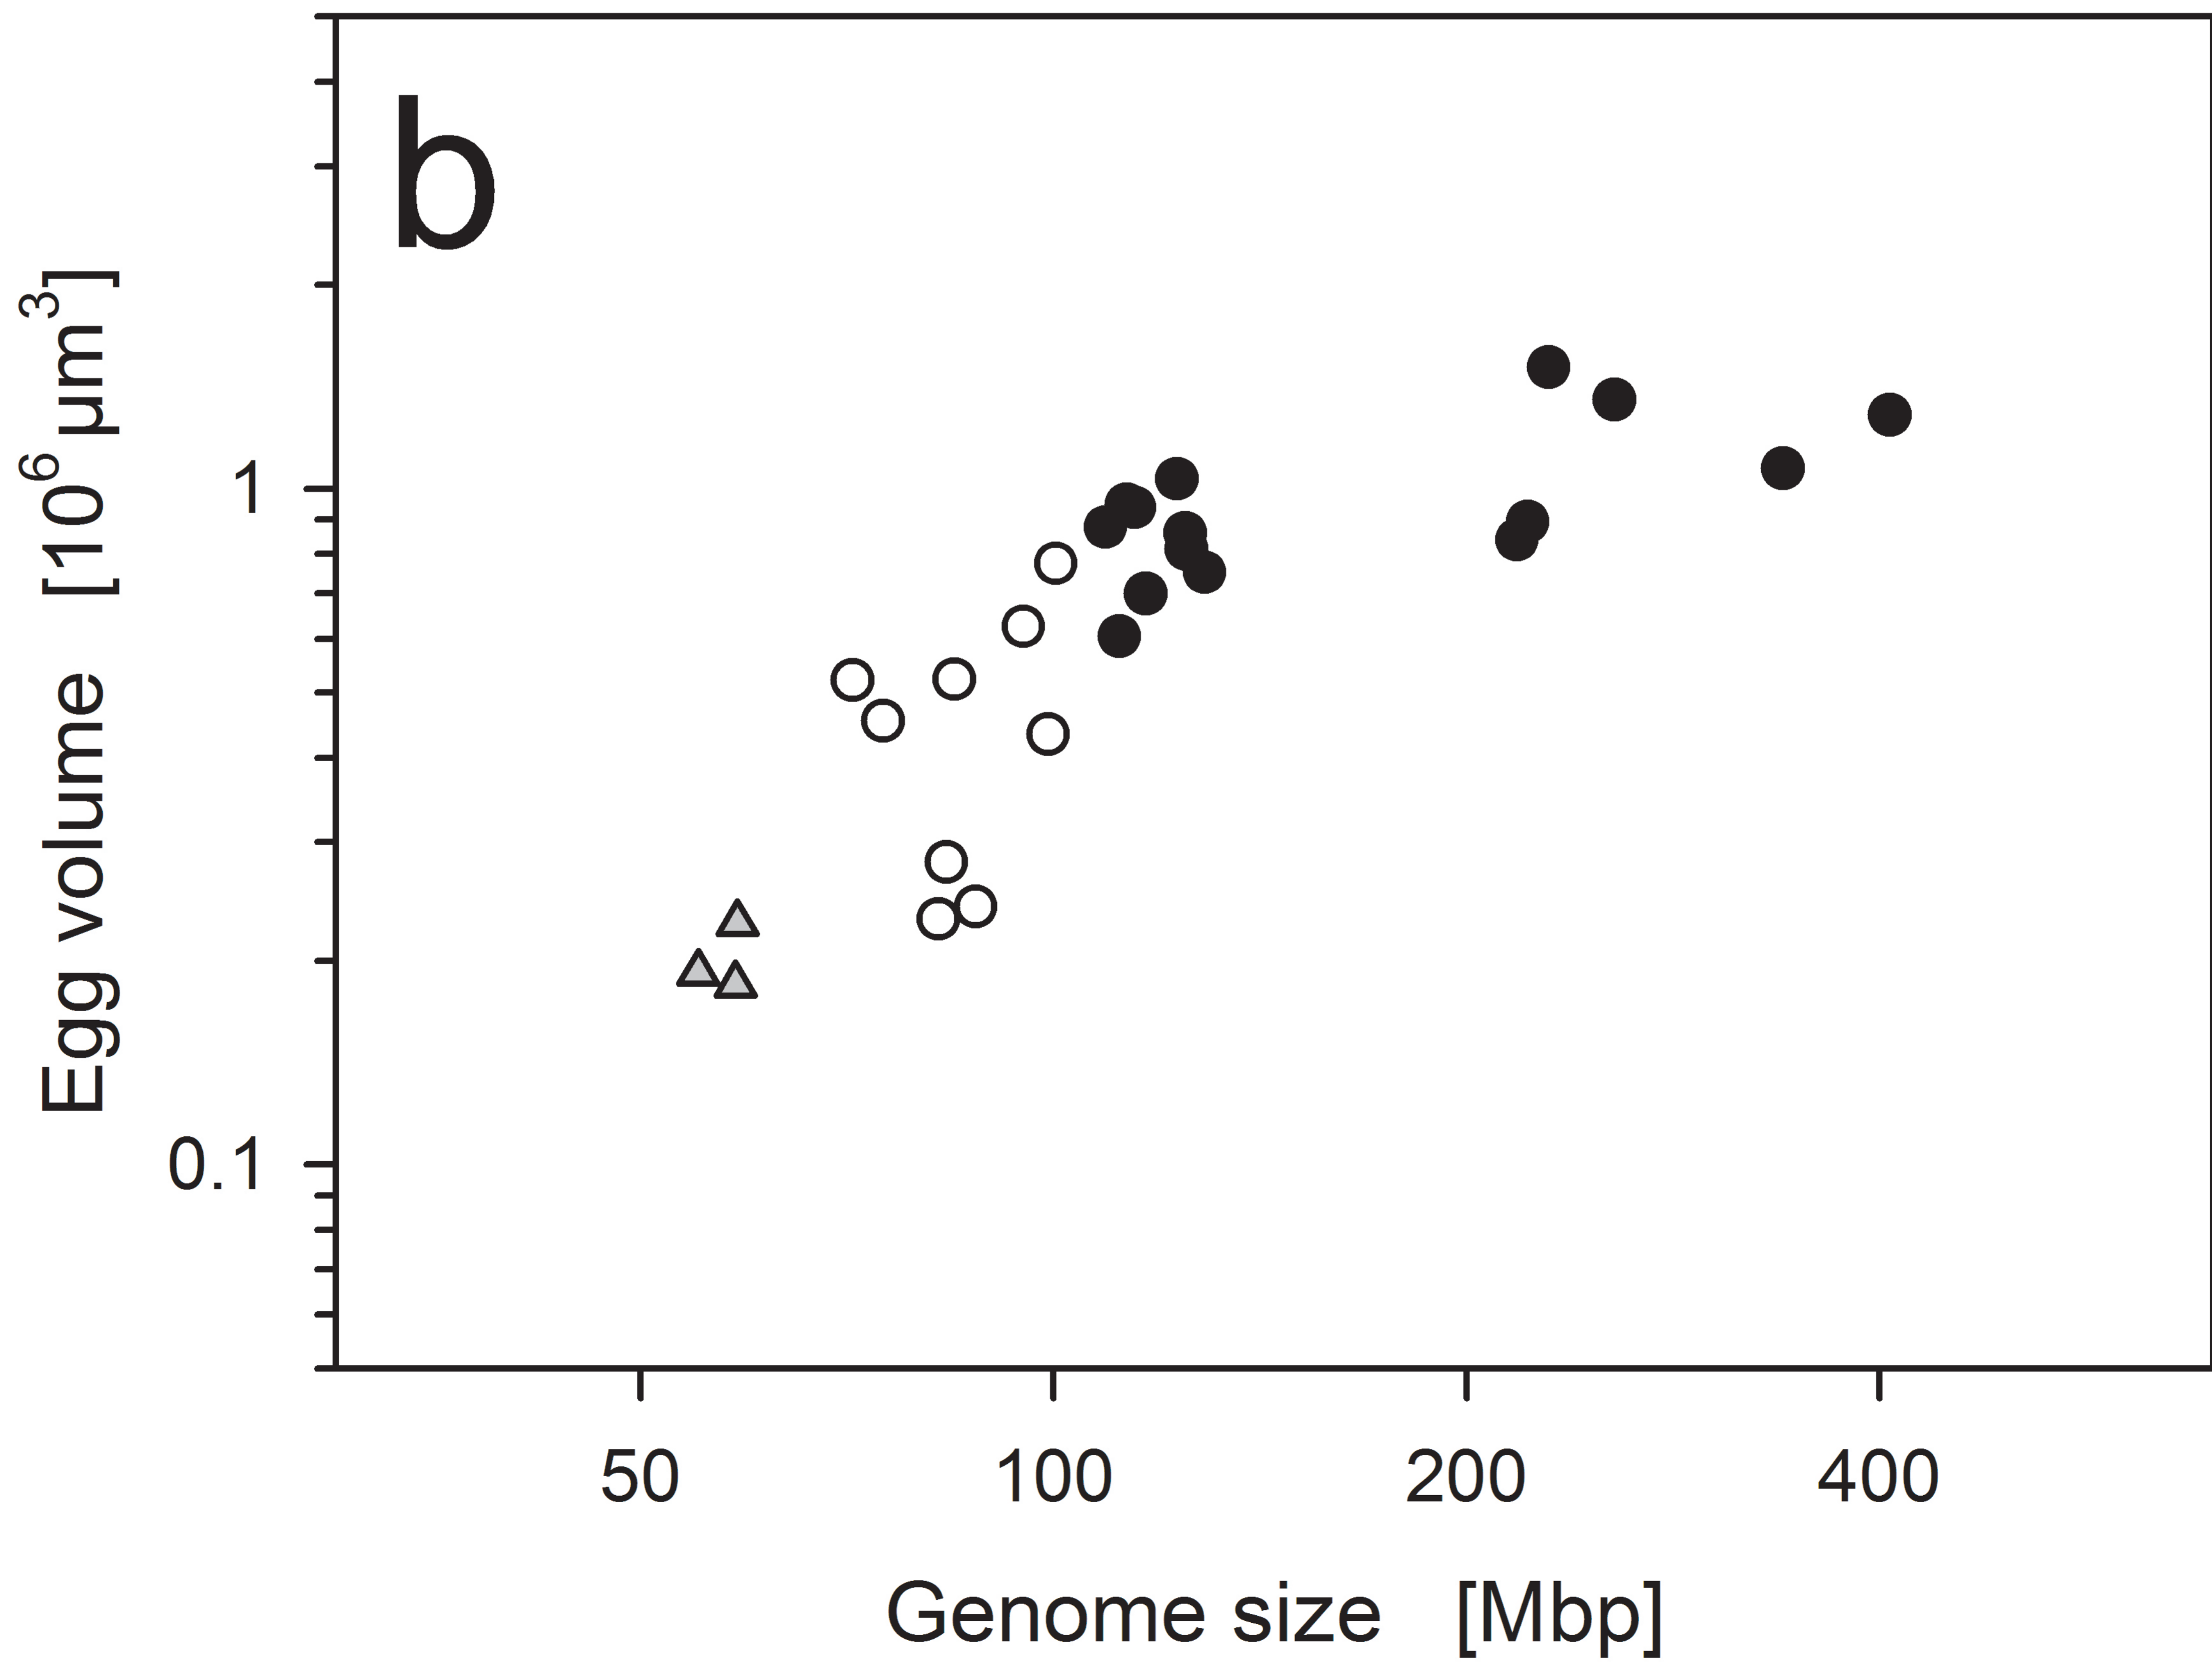

Supplement: 12862_2010_1697_MOESM3_ESM.pdf [file 12862_2010_1697_MOESM3_ESM.pdf]
